1 September 10, 2020

2

3 **Gut metabolites influence susceptibility of neonatal mice to cryptosporidiosis.**

4

5 Kelli L. VanDussen<sup>1,2#</sup>, Lisa J. Funkhouser-Jones<sup>3#</sup>, Marianna E. Akey<sup>3</sup>, Deborah A. Schaefer<sup>4</sup>, Kevin  
6 Ackman<sup>4</sup>, Michael W. Riggs<sup>4</sup>, Thaddeus S. Stappenbeck<sup>1,5</sup>, and L. David Sibley<sup>3\*</sup>

7

8 Running title: *Gut metabolites influence cryptosporidiosis*

9

10 <sup>1</sup>Department of Pathology and Immunology, Washington University School of Medicine, Saint Louis, MO,  
11 USA

12 <sup>2</sup>Current address: Department of Pediatrics, Divisions of Gastroenterology, Hepatology, and Nutrition  
13 and of Developmental Biology, University of Cincinnati College of Medicine and the Cincinnati  
14 Children's Hospital Medical Center, Cincinnati, OH, USA

15 <sup>3</sup>Department of Molecular Microbiology, Washington University School of Medicine, Saint Louis, MO,  
16 USA

17 <sup>4</sup>School of Animal and Comparative Biomedical Sciences, College of Agriculture and Life Sciences,  
18 University of Arizona, Tucson, AZ, USA

19 <sup>5</sup>Current address: Lerner Research Institute, Cleveland Clinic, Cleveland, OH, USA

20

21 # Contributed equally

22

23 \*Corresponding author: [sibley@wustl.edu](mailto:sibley@wustl.edu)

24

25

26 **Abstract**

27 The protozoan parasite *Cryptosporidium* is a leading cause of diarrheal disease in those with  
28 compromised or under-developed immune systems, particularly infants and toddlers in resource-poor  
29 localities. As an enteric pathogen, *Cryptosporidium* invades the apical surface of intestinal epithelial  
30 cells, where it resides in close proximity to metabolites in the intestinal lumen. However, the effect of  
31 gut metabolites on susceptibility to *Cryptosporidium* infection remains largely unstudied. Here, we first  
32 identified which gut metabolites are prevalent in neonatal mice when they are most susceptible to  
33 *Cryptosporidium parvum* infection, and then tested the isolated effects of these metabolites on *C.*  
34 *parvum* invasion and growth. Our findings demonstrate that medium or long-chain saturated fatty acids  
35 inhibit *C. parvum* growth, while long-chain unsaturated fatty acids enhance *C. parvum* invasion. The  
36 influence of these two classes of metabolites on *C. parvum* infection likely reflects the streamlined  
37 metabolism in *C. parvum*, which is unable to synthesize fatty acids. Hence, gut metabolites, either from  
38 diet or produced by the microbiota, play an important role in the early susceptibility to cryptosporidiosis  
39 seen in young animals.

40

41 **Importance**

42 *Cryptosporidium* occupies a unique intracellular niche that exposes the parasite to both host cell  
43 contents and the intestinal lumen, including metabolites from the diet and produced by the microbiota.  
44 Both dietary and microbial products change over the course of early development, and could contribute  
45 to the changes seen in susceptibility to cryptosporidiosis in humans and mice. Consistent with this  
46 model, we show that the immature gut metabolome influenced growth of *C. parvum in vitro* and may  
47 increase susceptibility to infection in young mice. Interestingly, metabolites that significantly altered  
48 parasite growth were fatty acids, a class of molecules that *Cryptosporidium* is unable to synthesize *de*  
49 *novo*. The enhancing effects of polyunsaturated fatty acids and the inhibitory effects of saturated fatty  
50 acids provide further insight into reliance on fatty acid salvage and metabolism of this enteric parasite.

51

52 **Main**

53 *Cryptosporidium* has gained notoriety in recent years due to its surprising prevalence as a major  
54 enteric diarrheal pathogen in children under two years of age in Africa and South East Asia(1, 2). The  
55 parasite is transmitted by a direct oral-fecal route, often through the ingestion of environmentally  
56 resistant oocysts in contaminated water supplies(3). Cryptosporidiosis in humans is primarily caused by  
57 two species: *Cryptosporidium parvum* infects a wide variety of domestic livestock and is transferred to

58 humans as a zoonotic infection, although some subtypes are known to circulate more directly between  
59 humans(4, 5). By contrast, *C. hominis* is almost exclusively transmitted human-to-human(5, 6).  
60 Treatment options for cryptosporidiosis are very limited as the only FDA-approved drug, nitazoxanide, is  
61 ineffective in immunocompromised patients and not approved for use in children(7).

62 Numerous studies demonstrate that neonatal animals are highly susceptible to *Cryptosporidium* and  
63 that resistance to infection increases with age in mice(8), dairy calves(9), and humans(1, 2). In fact, the  
64 Global Enteric Multicenter Study (GEMS) found that, in developing countries, *Cryptosporidium* was the  
65 second leading cause of diarrheal episodes in infants (0-11 months of age), the third leading cause in  
66 toddlers (12 – 23 months of age) and nearly absent in children two years and older(1, 2). Why neonatal  
67 animals are particularly susceptible to the parasite, and what causes them to become resistant as they  
68 age, is not well understood but could result from changes in immune system, microbiota, or diet, all of  
69 which change dramatically in early life.

70 Interestingly, the increase in resistance to *Cryptosporidium* infection correlates with time of  
71 weaning, when drastic shifts in the diversity and composition of the gut microbiota occur in both  
72 neonatal mice and human infants(10, 11). As enteric pathogens, *Cryptosporidium* primarily infect the  
73 apical end of small intestinal enterocytes, where they are enveloped by host membranes but remain  
74 extra-cytoplasmic (12, 13). Protrusion of the parasite-containing vacuole into the intestinal luminal  
75 space places them near the mucosal layers and associated gut microbiota. In fact, several studies have  
76 shown that *C. parvum* infection alters the microbiota of mice(14, 15), and treatment with a probiotic  
77 enhanced *C. parvum* infection, presumably by altering the microbiota(16). Furthermore, loss of the  
78 microbiota in gnotobiotic and antibiotics-treated adult mice results in an increased susceptibility to  
79 *Cryptosporidium* infection(17), indicating that a diverse, mature microbiota provides a protective effect  
80 against *Cryptosporidium*. A recent study comparing different antibiotics revealed that cloxacilin  
81 treatment of mice induced changes in the microbiota and altered metabolites with increased  
82 susceptibility (18).

83 Since *Cryptosporidium* spends most of its life cycle inside a host cell, interactions between the  
84 parasite and the microbiota are likely mediated through metabolites in the intestinal luminal space.  
85 Consistent with this idea, one study showed that high levels of fecal indole, a microbial metabolite,  
86 protected human volunteers from infection by *C. hominis* as monitored by oocysts shedding(19). While  
87 indole appears to inhibit the parasite, it is possible that other gut metabolites may promote  
88 *Cryptosporidium* growth. The genomes of *C. parvum*(20) and *C. hominis*(21) are highly streamlined, with  
89 the loss of many metabolic pathways and the expansion of transporters(22); hence, they must acquire

90 many basic nutrients from their host or surrounding environs. It is possible that metabolites highly  
91 enriched in the neonatal gut, either derived from diet or the microbiota, are beneficial to the parasite  
92 and that the transition from milk to solid food, which is accompanied by changes in the microbiota,  
93 deprives *Cryptosporidium* of an essential nutrient.

94 In the present study, we undertook a systematic study of the changes in susceptibility of neonatal  
95 mice and the correlated change in the collective metabolites found in the lumen of the gut on the  
96 growth of *C. parvum*. Our findings reflect both enhancing and inhibitor activities of metabolites,  
97 indicating that gut metabolites influence susceptibility to infection during early development.

98

## 99 **Results**

### 100 **Age-dependent susceptibility to *C. parvum* in a neonatal mouse model of cryptosporidiosis**

101 To identify gut metabolites that may facilitate *Cryptosporidium* infection, we first determined the  
102 critical window of susceptibility to *C. parvum* in a neonatal mouse model of cryptosporidiosis. Four  
103 groups of ten pups each were reared simultaneously, and a subset of pups was infected each week with  
104  $5 \times 10^4$  *C. parvum* oocysts (Fig. 1a, Supplementary Fig. 1). After five days of infection, the number of *C.*  
105 *parvum* genome equivalents in whole intestines was measured using quantitative PCR (qPCR) and  
106 normalized to the initial weight of the intestinal sample (Fig. 1b). Mice infected at one week of age had  
107 the highest number of *C. parvum* per gram of intestine, while parasite numbers dropped 10-fold in mice  
108 infected at two-weeks old (Fig. 1b). Mice inoculated at 3-weeks-old had the sharpest decline in *C.*  
109 *parvum* infection, with five orders of magnitude less *C. parvum* per gram of intestine than 1-week-old  
110 mice (Fig. 1b). Infection levels remained consistently lower for mice infected at 4, 5 and 6 weeks of age  
111 (Fig. 1b), indicating that mice are most susceptible to *C. parvum* infection within the first two weeks of  
112 life and experience a drastic reduction in parasite load when infected after this brief window of  
113 susceptibility.

114 To verify the course of age-dependent gut microbiome maturation in our model, we collected cecal  
115 contents from uninfected mice at timepoints when they are most susceptible (1 and 2 weeks of age) or  
116 relatively resistant (3 and 6 weeks of age) to infection (Fig. 1a, Supplementary Fig. 1) and performed 16S  
117 ribosomal RNA sequencing analysis. This analysis revealed drastic changes in the taxonomic composition  
118 of microbiota as the mice aged (Fig. 1c), similar to observations of previous studies in neonatal mice (10,  
119 23-25). The microbial communities from 1-week-old mice were the least diverse of all four age groups  
120 (Supplementary Fig. 2a) and were dominated by facultative anaerobes from the Actinobacillus,  
121 Lactobacillus, and Escherichia genera (Fig. 1c, Supplementary Fig. 2b,c). By two weeks of age, the

122 microbiota had transitioned to mostly strict anaerobes including Bacteroides, Parabacteroides, and  
123 Clostridium (Fig. 1c). In samples from 3-week and 6-week-old mice, Clostridium remained a significant  
124 fraction of the microbiota, while the relative abundances of Bacteroides and Parabacteroides decreased  
125 with a concurrent rise of the Blautia and Mucispirillum genera (Fig. 1c, Supplementary Fig. 2b,c). When  
126 all four age groups were analyzed together, a PCoA plot of weighted Unifrac distances shows distinct  
127 clusters for 1- and 2-week-old samples, while samples from 3- and 6-week-old mice overlap (Fig. 2a).

128

### 129 **Changes in luminal metabolite composition over the first six weeks of life**

130 To identify metabolites that could influence susceptibility to *C. parvum* infection, we collected small  
131 intestine luminal flush samples from the same mice as the microbiome analysis and quantified  
132 metabolites present using gas chromatography time-of-flight mass spectrometry (GC-TOF MS). A PCA  
133 plot of metabolite similarities between all samples revealed a similar pattern as the microbiome Unifrac  
134 analysis: metabolites from 1- and 2-week-old mice formed independent clusters, while those from 3-  
135 and 6-week-old mice were interspersed (Fig. 2b). Hierarchical clustering of the 30 metabolites with the  
136 lowest FDR-corrected p-values by one-way ANOVA revealed a strong enrichment of fatty acids and their  
137 glycerol esters (e.g., myristic acid and monomyristin; palmitic acid and monopalmitin) in 1-week samples  
138 only (Fig. 2c). In contrast, several metabolites, such as 3-hydroxybutric acid, UDP-N-acetylglucosamine  
139 and glucose-6-phosphate, were enriched in the first two weeks of life but decreased by three weeks. As  
140 expected given their overlapping PCA clusters (Fig. 2b), 3-week and 6-week samples were mostly  
141 enriched for the same metabolites (Fig. 2c) when compared to earlier timepoints. However, sugar  
142 alcohols such as erythritol, xylitol and lyxitol were generally more abundant at 3-weeks than at 6-weeks,  
143 while amino acids uracil and glutamic acid and bile acids (cholic and deoxycholic acid) were highest at 6-  
144 weeks (Fig. 2c).

145 A similar, but not identical, pattern emerged when Pearson's correlation was used to find the top 30  
146 metabolites whose abundances changed linearly over time (i.e., were either positively or negatively  
147 correlated with age) (Fig. 2d). The same fatty acids and their glycerol esters that were enriched in 1-  
148 week-old samples (Fig. 2c) were negatively correlated with age, with the addition of docosahexaenoic  
149 acid and lignoceric acid (Fig. 2d). Similarly, many of the metabolites enriched at the two later timepoints  
150 were positively correlated with age, with the cholic and deoxycholic bile acids having the strongest  
151 correlation (Fig. 2d).

152

### 153 **Screening for effects of neonatal metabolites on *C. parvum* growth in vitro**

154 To determine if any of the metabolites negatively correlated with age (i.e., highest in 1-week-old  
155 samples) were sufficient to enhance *C. parvum* infection, we screened 43 metabolites for their effect on  
156 *C. parvum* growth in an HCT-8 human adenocarcinoma cell line (Table S1). All metabolites with a  
157 negative correlation with age (i.e. Pearson test) with an FDR-corrected *P* value < 0.05 were included in  
158 the screen except for those that proved insoluble or were not readily available for purchase. We also  
159 excluded metabolites associated with the microbiota of adult mice that were identified in a previous  
160 study comparing germ-free to recolonized mice (26). *C. parvum* growth was quantified using an image-  
161 based assay in which *C. parvum* oocysts were added with a single metabolite to HCT-8 cells plated in a  
162 96-well format. After 24 hr of incubation, fixed cells were labeled with Pan-Cp, a polyclonal antibody  
163 that recognizes all stages of *C. parvum* (27), and stained with Hoechst 33342 to visualize host nuclei. The  
164 number of *C. parvum* and host nuclei in each well were quantified by an automated imaging platform  
165 and normalized to DMSO-treated control wells. Most metabolites were screened at 0.5 mM, but several  
166 metabolites required lower concentrations (either 0.1 mM or 0.02 mM) to avoid host toxicity issues (Fig.  
167 3).

168 Out of the 43 metabolites screened, seven significantly inhibited *C. parvum* growth, while 15  
169 significantly enhanced *C. parvum* infection compared to the DMSO control (Fig. 3). Interestingly, all of  
170 the inhibitory metabolites were medium- or long-chain saturated fatty acids and/or their glycerol esters:  
171 capric acid (C10:0); lauric acid (C12:0); myristic acid (C14:0) and monomyristin; palmitic acid (C16:0) and  
172 1-monopalmitin; and 1-monostearin (C18:0). Not all saturated fatty acids were inhibitory: most had no  
173 effect and two, pentadecanoic acid (C15:0) and behenic acid (C22:0), modestly enhanced *C. parvum*  
174 growth. However, the three most potent enhancers (1.3 – 1.4X growth) were omega-3 or omega-6  
175 polyunsaturated fatty acids: docosahexaenoic acid (DHA, C22:6), linolenic acid (LnA, C18:3) and linoleic  
176 acid (LA, C18:2). All the inhibitors and the most effective enhancers (DHA, LA, and LnA) fall within the  
177 top 20 metabolites when ranked based on their abundance fold change from week 1 to week 3 (Fig. 3a).  
178 When ranked by abundance at week 1, LA and LnA remain in the top 20 metabolites along with all  
179 inhibitors except for 1-monostearin (Fig. 3b). Thus, metabolites may have both protective and  
180 detrimental effects on susceptibility to *C. parvum* infection in the neonatal gut.

181

### 182 **Effects of omega-3 and omega-6 polyunsaturated fatty acids on *C. parvum* growth and invasion**

183 Because the most potent enhancers in our screen were all omega-3 or omega-6 polyunsaturated  
184 fatty acids, we investigated whether other members of the omega-3 and omega-6 fatty acid families  
185 could positively affect *C. parvum* growth. Indeed, omega-3 eicosapentaenoic acid (EPA, C20:5) and

186 omega-6 arachidonic acid (AA, C20:4) significantly enhanced *C. parvum* growth to the same extent as  
187 DHA, LA and LnA in a 24 hr growth assay (Fig. 4a), indicating that these two classes of fatty acids have a  
188 general positive effect on *C. parvum* infection. To investigate whether omega-3 and omega-6 fatty acids  
189 affect invasion efficiency of *C. parvum*, we infected HCT-8 cells with filtered sporozoites and treated  
190 with either DHA, LA, or LnA during a 2.5 hr invasion period. Cells were then extensively washed before  
191 fixing, staining, and imaging as described above. All three metabolites significantly increased the number  
192 of *C. parvum* present in the wells compared to the DMSO control, with LA and LnA having a slightly  
193 stronger effect than DHA (Fig. 4b). In contrast, parasite numbers did not significantly increase in HCT-8  
194 cells that had been pretreated with DHA, LA, or LnA for 2 hr before infection with filtered sporozoites  
195 (Fig. 4b). This suggests that the fatty acids may be directly facilitating sporozoite adhesion or invasion to  
196 host cells, rather than acting through a host signaling pathway to “prime” the cells for invasion.

197 To determine if the effects of metabolites on parasite growth may be time dependent, samples  
198 infected with filtered sporozoites were treated with LA, LnA, or DHA either during invasion (0-2.5 hours  
199 post-infection (hpi)), after invasion (2.5-24 hpi), or for the duration of the experiment (0-24 hpi). All  
200 samples were washed extensively 2.5 hpi to remove unattached sporozoites, and the culture media was  
201 replaced with or without metabolite solution depending on the respective treatment group. After 24  
202 hpi, all samples were fixed, stained, and imaged as described above. For samples treated with LA, LnA,  
203 or DHA, parasite growth was significantly enhanced compared to the DMSO control when cells were  
204 treated from either 0-2.5 hpi or 0-24 hpi (Fig. 4c). However, when treatment began after invasion,  
205 treatment with LA significantly inhibited parasite growth, while treatment with LnA had no effect (Fig.  
206 4c). Treatment with DHA from 2.5-24 hpi increased parasite growth relative to the control, but the  
207 magnitude of growth enhancement was far lower in samples treated after invasion than in samples  
208 where treatment began 0 hpi (Fig. 4c). These results indicate that the enhancement of parasite growth  
209 resulting from treatment with LA, LnA, and DHA is dependent on the presence of these metabolites  
210 during the first 2.5 hpi. This result implies that the increased parasite growth observed at later  
211 timepoints may directly result from the positive effects of metabolite treatment on sporozoite adhesion  
212 or invasion.

213 Because long-term culture and sexual reproduction of parasites is not supported in HCT-8 cell  
214 cultures, we tested whether metabolite treatment of parasites grown in air-liquid interface culture, a  
215 mouse ileal stem cell culture that allows complete development of the life cycle in vitro, would result in  
216 similar parasite growth enhancement(27). To determine this, transwells containing differentiated mouse  
217 intestinal epithelial cells (mIEC) were infected with filtered parasites and treated with LA, LnA, or DHA in



218 both the top and bottom of transwells for 3 hr. All transwells were then washed to remove unattached  
219 sporozoites, and both the top and bottom of each transwell were treated with medium containing  
220 either DMSO or metabolite solution for the duration of the experiment. On days 0, 1, 3 and 5 post  
221 infection, DNA samples were collected from transwells, and *C. parvum* and mIEC genomic DNA  
222 quantities were determined using qPCR and standard curve analysis. Treatment with LA or DHA  
223 significantly enhanced parasite growth relative to the DMSO control at multiple timepoints, and  
224 treatment with LnA significantly enhanced the magnitude of parasite growth at all time points compared  
225 to the control (Fig. 4d). Metabolite treatments did not have adverse effects on epithelial culture and  
226 although they enhanced cell monolayer densities at some time points, this pattern did not correlate the  
227 enhanced growth of *C. parvum* (Fig. S1). Interestingly, treatment with LnA also increased the rate of  
228 parasite growth from day 0 to day 5 by 3-fold relative to the DMSO control, suggesting that the fatty  
229 acid may also be enhancing parasite replication after invasion. As a result, transwells treated  
230 continuously with LnA contained significantly greater quantities of *C. parvum* five days post infection  
231 (Fig. 4d).

232

## 233 Discussion

234 Neonatal animals, including humans, are highly susceptible to *Cryptosporidium* infection, but quickly  
235 become resistant to the parasite as they age. In a neonatal mouse model of cryptosporidiosis, we found  
236 that susceptibility to the pathogen decreases sharply between two and three-weeks of life, concurrent  
237 with the cessation of breastfeeding and transition to solid food. This change in diet correlated with  
238 drastic shifts in the gut microbiota and luminal metabolites, particularly the reduction of fatty acids  
239 typically found in breast milk. Exogenous addition of these fatty acids to in vitro cultures revealed that  
240 medium-to-long chain saturated fatty acids tend to inhibit *C. parvum* growth, while omega-3 and  
241 omega-6 polyunsaturated fatty acids enhance parasite invasion.

242 Previous studies in mice demonstrate that the gut microbiota changes dramatically during the first  
243 few weeks of life, especially following the dietary transition from breast milk to solid food(10, 24, 25).  
244 Specifically, these studies found that neonatal mice were first colonized by facultative anaerobes  $\gamma$ -  
245 Proteobacteria and Lactobacillales, which were progressively replaced by obligate anaerobes Clostridia  
246 and Bacteroidia during and after weaning(10, 24, 25). We observed similar developmental changes in  
247 the microbiota of our neonatal mice: in the first week of life, Lactobacillus and Actinobacillus (a  $\gamma$ -  
248 proteobacteria) dominated the community and were replaced by two weeks of age with strict  
249 anaerobes including Clostridium and Bacteroides. Clostridium remained a significant fraction of the



250 microbial community in mice post-weaning, while *Bacteroides* declined over time. Interestingly, a  
251 previous study that colonized germ free mice with cecal contents from neonatal (4-12 day) or adult mice  
252 (7 weeks) found that *Clostridia* (but not *Bacteroides*) protected mice colonized with adult microbiota  
253 against the enteric pathogens *Salmonella typhimurium* and *Citrobacter rodentium*(25). Although the  
254 protective mechanism is not fully understood, it was independent of innate and adaptive immune  
255 responses but was modulated by metabolites including succinate(25).

256 Concurrent with the microbial changes over time, the gut metabolome in our mice also transitioned  
257 as they aged: medium- and long-chain fatty acids were abundant in 1- and 2-week-old mice and were  
258 gradually replaced with sugar alcohols, amino acids, and bile salts in the 3- and 6-week-old mice. The  
259 abundance of fatty acids in pre-weaned mice reveals the significant contribution of diet to the overall  
260 gut metabolome, as fatty acids are important constituents of breast milk(28-31). In contrast, the  
261 metabolites enriched by week 6 begin to resemble those found in adult mice(26), and several are  
262 metabolic byproducts of intestinal bacteria, such as 2,8-hydroxyquinoline(32) and the secondary bile  
263 acid, deoxycholic acid(33). Hence, the shift in metabolite profiles after weaning is likely due to the  
264 absence of milk as a nutrient source as well as the production or induction of metabolites by a more  
265 mature microbiota.

266 Importantly, several of the fatty acids that were abundant in 1-week-old neonatal mice enhanced or  
267 inhibited the growth of the *C. parvum* in vitro. *C. parvum* is thought to lack a system for de novo fatty  
268 acid synthesis, instead relying on salvage from the host(22). It also lacks  $\beta$ -oxidation and cannot use  
269 fatty acids as an energy source(22). However, it contains three isoforms of the enzyme for acyl-Co-A  
270 addition (acyl co-A synthase (ACS))(34) needed for activating fatty acids salvaged from the host, a fatty  
271 acid synthase (FAS1) that functions as an elongase(35), and a long chain fatty acid elongase (LCE)(36). Of  
272 these enzymes, ACS isoforms prefer saturated substrates of C12-C18, and LCE prefers saturated  
273 substrates of C14-C16(36). The loading domain of CpFAS1 prefers palmitic acid (C16:0), but enzyme  
274 activity has been documented with substrates C12-C24 as well(37). Given these substrate preferences, it  
275 is somewhat surprising that medium chain fatty acids such as lauric acid (C12:0), myristic acid (C14:0)  
276 and palmitic acid (C16:0) inhibited *C. parvum* growth in vitro. One potential explanation for their  
277 inhibitory effects could be if these medium chain fatty acids inhibit the terminal reductase domain of  
278 FAS1, which normally prefers much longer chain substrates (i.e. > C24)(35). It is also possible that these  
279 fatty acids integrate into parasite membranes and upset the normal balance of lipids, hence  
280 compromising cellular functions. These medium-chain fatty acids have also been shown to inhibit  
281 bacterial growth in vitro(38, 39). Among these inhibitory compounds, capric acid, the strongest growth

282 inhibitor in the 24 hr growth assay, has also been shown to inhibit *Candida albicans* growth and biofilm  
283 formation by altering gene expression(40), suggesting it has broad cross-phylum activity.

284 Several metabolites found early in the neonatal period enhanced *C. parvum* growth in vitro. For  
285 example, the long-chain, omega-3 or omega-6 polyunsaturated fatty acids, linoleic acid (LA, C18:2),  
286 linolenic acid (LnA, C18:3), and docosahexaenoic acid (DHA, C22:6) were all significant enhancers of  
287 parasite growth. Interestingly, this enhancement was also dependent on the timing of exposure:  
288 although pretreatment of host cells had no effect on subsequent infection, exposure during the first 2.5  
289 hr of infection was critical to the enhancing effect. This timing suggests that these metabolites act to  
290 enhance invasion and/or formation of the parasitophorous vacuole that encases the parasite(12, 13).  
291 Since invasion and vacuole membrane formation require reorganization of host and parasite  
292 membranes in a rapid process of envelopment(41-43), the enhancing effects of these long chain  
293 unsaturated fatty acids may reflect the important properties they have on membrane composition,  
294 fluidity, and signaling(44, 45).

295 Although our studies were performed largely in vitro, they have important implications for  
296 infections in vivo. When metabolites were ranked by on overall abundance (based on the MS spectral  
297 counts), several of the enhancing metabolites, including LA, LnA, and DHA, were among the top half of  
298 the most abundant metabolites enriched in neonatal (1 and 2-week-old) pups, suggesting that they may  
299 contribute directly to increased susceptibility to *C. parvum* infection. Although our studies support a role  
300 for gut metabolites in modulating *C. parvum* infection, they are not the sole factors that determine  
301 increased susceptibility of neonatal mice to pathogens. Previous studies also indicate an important role  
302 for maturation of the immune system in susceptibility to infection during early life. In particular, CD103<sup>+</sup>  
303 CD11c<sup>+</sup> dendritic cells are found at low levels in neonatal mice and increase with maturation and during  
304 infection. Selective depletion of CD103<sup>+</sup> dendritic cells in Batf3 knockout mice(46), or increase in their  
305 number by delivery of Flt-3 ligand(47), suggest that changes in these innate immune cells may underlie  
306 changes in susceptibility to *C. parvum* during maturation. Interestingly, administration of poly-IC to  
307 neonatal mice stimulated immune responses, including expanded DC cell functions, that required the  
308 presence of gut flora(48), indicating that the microbiota and immune function are tightly linked during  
309 early development.

310 The findings of our studies also have important implications for human cryptosporidiosis. The  
311 human microbiota undergoes similar predictable transitions from facultative aerobic bacteria such as  
312 Enterobacteriaceae at birth, to organisms that specialize on a milk-based diet such as *Lactobacillus*, then  
313 finally to a more mature, “adult-like” microbiota by 2 to 3-years of age(49-51). Interestingly, the

314 microbiotas of children breast-feeding at 12-months-old are still dominated by Bifidobacterium and  
315 Lactobacillus, while the microbiotas of children that have stopped breast-feeding by this age are  
316 enriched in species prevalent in adults such as Clostridia(49). This suggests that the main driver of  
317 microbiota maturation is the cessation of breast-feeding and highlights the importance of breast milk in  
318 shaping the overall gut microbiota and metabolome. In our mice, polyunsaturated fatty acids in the gut  
319 lumen decreased significantly following weaning. Although fatty acid profiles in breast milk vary  
320 between species, all mammals produce essential fatty acids LA and LnA in their breast milk, as well as  
321 significant amounts of long-chain unsaturated fatty acids such as AA and DHA(31). Our finding that LA,  
322 LnA, AA and DHA all enhance sporozoite invasion suggests that human infants who are nursing may also  
323 be more susceptible to *Cryptosporidium* infection due to higher levels of these metabolites that are  
324 likely to be present in their guts, in comparisons to older, weaned children. These findings have  
325 important implications for the effects of diet and microbiota on the susceptibility of infants to  
326 cryptosporidiosis and possibly other enteric infections.

327

## 328 **Methods**

### 329 **Neonatal mouse model of *C. parvum* infection**

330 For infections of neonatal mice performed at the University of Arizona, *C. parvum* (Iowa strain) (52)  
331 oocysts were maintained by repeated passage in newborn *Cryptosporidium*-free Holstein bull calves  
332 (53), and purified from fecal material by sucrose density gradient centrifugation, as previously described  
333 (54).

334 To assess *C. parvum* infection levels with age in vivo, groups of 5 to 10 8-day-old specific pathogen-  
335 free ICR mice (Envigo) were used. All mice used in the present study were maintained in Biosafety Level  
336 2 (BSL-2) biocontainment at the University of Arizona in accordance with the PHS *Guide for the Care and*  
337 *Use of Laboratory Animals* and IACUC approval.

338 Neonatal mice were randomly assigned to litters as detailed in **Figure S1**. At 1 week intervals after  
339 birth, mice were gavaged with  $5 \times 10^4$  *C. parvum* (Iowa strain) oocysts (N = 10 mice each for 1 and 2-  
340 weeks of age, N = 5 mice each for 3-6 weeks of age). At 5 days post-infection (92-94 hr post-infection),  
341 the entire intestine was extracted from each mouse, weighed, and then homogenized using ceramic  
342 beads in the Bead Ruptor4 (OMNI International, Kennesaw, GA). DNA was extracted using the QIAamp  
343 Fast DNA stool mini kit (Qiagen, Gaithersburg, MD) with the following modifications: after the addition  
344 of InhibitEx buffer, the samples were incubated at 95°C (5 min), followed by 5 freeze-thaw cycles using

345 liquid nitrogen and a 37°C water bath. Total DNA in the samples was quantified by Nanodrop (Thermo  
346 Scientific, Waltham, MA).

347 Quantitative PCR (qPCR) for the *C. parvum* 18s rRNA (18S) was performed using the following  
348 primers: ChvF18S (5'- CAATAGCGTATATTAAGTTGTTGCAGTT-3' and ChvR18S (5'-  
349 CTGCTTTAAGCACTCTAATTTCTCAAA-3') (55) For qPCR, each 25 µL reaction contained a final  
350 concentration of 100 nM for both forward and reverse primers, (Invitrogen, Grand Island, NY) and  
351 12.5 µL SYBR green Fast mix (Quantabio, Gaithersburg, MD). Genomic DNA (2 µL) was added, and the  
352 qPCR was performed in an ABI StepOne Plus Real-Time PCR System (Applied Biosystems, Grand Island,  
353 NY) with cycling conditions of 10 min incubation at 94°C followed by 45 cycles at 94°C for 10 sec, 54°C  
354 for 30 sec, and 72°C for 10 sec. Each sample was run in triplicate. A control with no template was run  
355 concurrently and was consistently negative. The number of *C. parvum* genomic equivalents was  
356 calculated for each sample based on a standard curve using DNA from known quantities of *C. parvum*  
357 oocysts and divided by the original weight of the intestinal sample to obtain the number of *C. parvum*  
358 organisms per gram intestine.

359

### 360 **Sample collection for 16S sequencing and metabolomics**

361 Six pregnant ICR dams with litter sizes of 10 pups each were obtained from the same source (Envigo) as  
362 used for the neonatal infection experiment. Dams and the resulting pups were maintained in a specific  
363 pathogen-free barrier facility at Washington University School of Medicine with a strict 12-hr light cycle  
364 and ad libitum access to food and water. Mice were housed in complete autoclaved cage assemblies  
365 containing the same chow (Envigo NIH-31 Irradiated Modified Open Formula Mouse/Rat Diet 7913) and  
366 bedding (Envigo Teklad 7097 1/4" Corncob bedding) used in the neonatal infection experiment. To  
367 minimize experimental variation that could potentially arise from single cages or dams, 2 pups were  
368 randomly selected from each litter per timepoint (total of n=12 per timepoint) at 1-week, 2 weeks, 3  
369 weeks, 4 weeks, and 6 weeks of age. Weaning was performed as usual at 3 weeks of age, with pups of  
370 the same sex housed only with littermates in fresh autoclaved cage assemblies. All procedures were  
371 approved by the Institutional Animal Care and Use Committee at Washington University School of  
372 Medicine. For collection of small intestinal luminal flushings for metabolomics, pups were euthanized  
373 and then the entire length of small intestine was dissected out intact and flushed with 500 µL of sterile  
374 phosphate-buffered saline (PBS) using a 1-mL syringe tipped with a blunt needle; small intestinal luminal  
375 contents from the flush were collected directly into a tared cryotube, weighed, and snap frozen in liquid  
376 nitrogen. For collection of cecal contents for 16s rRNA sequencing, the intact cecum was dissected and

377 placed into a tared cryotube (pups aged 1, 2, or 3 weeks) or cecal contents were collected using a  
378 sterilized spatula and placed into a tared cryotube (pups aged 4 or 6 weeks); the material was weighed  
379 and then snap frozen in liquid nitrogen.

380

### 381 **16S sequencing and analysis**

382 DNA from cecal contents was isolated using the QIAamp DNA Stool Mini Kit (QIAGEN). The Washington  
383 University Genome Technology Access Center performed PCR amplification of all nine 16S variable  
384 regions with the Fluidigm Access Array System, indexing, pooling, and sequencing with an Illumina  
385 MiSeq Sequencer, as previously described(56). Sequencing data analysis either used the V1-V9 regions  
386 and the MVRSION pipeline(57) or the V4 region and QIIME pipeline version 1.9.0(58), as previously  
387 described(56). The OTU table resulting from QIIME analysis was used as input for linear discriminant  
388 analysis (LDA) effect size (LEfSe)(59) (<http://huttenhower.sph.harvard.edu/lefse/>) to identify statistically  
389 significant, differentially abundant taxa between the 1-week and 6-week old mice.

390

### 391 **Metabolite profiling and analysis**

392 Untargeted metabolomics of the small intestinal luminal flushing samples by GC-TOF mass spectrometry  
393 was performed by the West Coast Metabolomics Center using the primary metabolism platform and a  
394 Leco Pegasus IV mass spectrometer. Of the 759 metabolites identified, 213 were annotated and used for  
395 further analysis. Data was normalized across samples by averaged Week1 values, before being  $\log_2$   
396 transformed and autoscaled. Data normalization and downstream univariate, multivariate, and  
397 clustering analyses were performed with Metaboanalyst 3.0 (<https://www.metaboanalyst.ca>)(60).

398

### 399 **HCT-8 cell culture and infection**

400 For in vitro infection studies in human cell lines, *C. parvum* (AUCP-1 strain) oocysts were obtained from  
401 the Witola lab at the University of Illinois at Urbana-Champaign, where they were maintained by  
402 repeated passage in male Holstein calves and purified from fecal material as previously described.  
403 Animal procedures were approved by the Institutional Animal Studies Committee at the University of  
404 Illinois at Urbana-Champaign (61). Purified oocysts were stored at 4°C in PBS plus 50 mM Tris and 10  
405 mM EDTA (pH 7.2) for up to six months before use.

406 Human ileocecal adenocarcinoma cells (HCT-8 cells, ATCC CCL-244) were maintained in RPMI 1640  
407 medium (Gibco, ATCC modification) supplemented with 10% fetal bovine serum. Cells were confirmed  
408 to be mycoplasma free with the e-Myco plus *Mycoplasma* PCR detection kit (Boca Scientific).

409

### 410 ***C. parvum* growth assay for initial metabolite screen**

411 Metabolites were chosen for the screen based on a negative Pearson coefficient and an FDR p-value  $\leq$   
412 0.05. Metabolites that were insoluble or not readily available for purchase were excluded. We also  
413 excluded metabolites that had previously been shown to be present in the gut metabolome of germ-  
414 free mice and, thus, not likely produced or induced by the microbiota (26). In total, we tested 43  
415 metabolites for their effects on *C. parvum* growth (Table S1).

416 All metabolites (Sigma-Aldrich) were reconstituted as 100 mM stock solutions in DMSO with the  
417 following exceptions: glucose-6-phosphate was dissolved in filtered PBS, phosphoethanolamine and  
418 glycerol-alpha-phosphate were dissolved in filtered dH<sub>2</sub>O, and cholesterol and arachidic acid were  
419 dissolved in filtered ethanol. HCT-8 cells were plated at  $2 \times 10^5$  cells per well in 96-well optically-clear-  
420 bottomed plates (Greiner Bio-One) and infected with  $1.2 \times 10^4$  to  $5 \times 10^4$  *C. parvum* oocysts (AUCP-1  
421 strain) per well after 24 hr of cell growth. Metabolites were diluted in culture medium and immediately  
422 added to the wells following the addition of oocysts for a final metabolite concentration of 0.02 mM to  
423 0.5 mM (depending on the metabolite) and 1% DMSO (three technical replicate wells per metabolite).  
424 Infected control wells containing only 1% DMSO media were included on each plate. At 24 hr after  
425 infection, wells were fixed in 4% formaldehyde for 10 min, washed twice with PBS, and then  
426 permeabilized and blocked for 20 min in blocking buffer composed of 0.1% Triton X-100 and 1% bovine  
427 serum albumin (BSA) in PBS. *C. parvum* were labeled with polyclonal rabbit anti-Cp antibody (27) diluted  
428 1:2000 in blocking buffer, followed by goat anti-rabbit Alexa Fluor 488 (1:1000, Thermo Fisher  
429 Scientific). Host nuclei were stained with Hoechst 33342 (5  $\mu$ g/ml, Thermo Fisher Scientific).

430 Plates were imaged with a 10X objective on a BioTek Cytation 3 cell imager (9 images per well in a 3  
431 x 3 grid). Gen5 software version 5.0.2 was used to quantify the total number of parasites (puncta in the  
432 GFP channel) and host cells (nuclei in the DAPI channel) in images from each well. Relative parasite  
433 growth and host cell viability for each metabolite was calculated as a ratio of the mean number of *C.*  
434 *parvum* parasites or host cells, respectively, in the treated versus DMSO control groups averaged across  
435 three independent experiments with three technical replicates per experiment. Statistical analyses were  
436 performed in GraphPad Prism 8 using a two-way ANOVA followed by a Dunnett's test for multiple  
437 comparisons, in which each metabolite was compared to the DMSO control.

438

### 439 ***C. parvum* invasion assay**

440 HCT-8 cells were plated at  $2 \times 10^5$  cells per well in 96-well optically-clear-bottomed plates (Greiner Bio-  
441 one) and cultured for 24 hr as described above. To determine the effect of metabolite treatment on host  
442 cells before the addition of parasites, metabolite solutions diluted in culture media were added to half  
443 of the plate for a final concentration of 0.1 mM to 0.5 mM (depending on the metabolite) and 0.5%  
444 DMSO for 2 hr then washed 3x with PBS. Bleached *C. parvum* oocysts (AUCP-1 strain) were excysted for  
445 1 hr at 37°C in a 0.75% sodium taurocholate solution and passed through a 1  $\mu$ m filter to remove  
446 unexcysted oocysts. All wells were infected with approximately  $2 \times 10^5$  excysted sporozoites. Metabolite  
447 solutions diluted in culture media were then added to the second half of the plate for a final  
448 concentration of 0.1 mM to 0.5 mM and 0.5% DMSO. Control wells containing only 0.5% DMSO culture  
449 media were included for each half of the plate at each time point. After 2.5 hr of infection, wells were  
450 fixed and stained with polyclonal rabbit anti-Cp antibody (1:5000), goat anti-rabbit Alexa Fluor 488  
451 (1:1000, Thermo Fisher Scientific), and Hoescht 33342 (5  $\mu$ g/ml, Thermo Fisher Scientific) as detailed  
452 above.

453 Parasites and host cells were imaged and quantified using the same protocol as the *C. parvum*  
454 growth assay. Relative parasite growth and host cell viability for each metabolite was calculated as a  
455 ratio of the mean number of *C. parvum* parasites or host cells, respectively, in the treated versus DMSO  
456 control groups averaged across three independent experiments with three technical replicates per  
457 experiment. Statistical analyses were performed in GraphPad Prism 8 using a two-way ANOVA followed  
458 by a Dunnett's test for multiple comparisons, in which each metabolite was compared to the DMSO  
459 control within each treatment group.

460

#### 461 ***C. parvum* invasion wash-out assay**

462 HCT-8 cells were plated  $2 \times 10^5$  cells per well in a clear-bottomed 96 well plate. After 24 hr of cell  
463 growth, cells were infected with  $1 \times 10^5$  filtered, excysted sporozoites per well. Immediately after  
464 infection, metabolite solutions (0.5 mM except for DHA that was 0.1 mM) or DMSO control were added  
465 to wells. After 2.5 hr of incubation, all wells were washed 2x with PBS, and metabolite solutions or  
466 DMSO control were added to wells as appropriate for each group. At 24 hpi, all wells were fixed and  
467 stained as described for the *C. parvum* invasion assay above.

468 Parasites and host cells were imaged and quantified as detailed in the *C. parvum* growth assay.  
469 Relative parasite growth and host cell viability for each metabolite were calculated as a ratio of the  
470 mean number of *C. parvum* parasites or host cells, respectively, in the treated versus DMSO control  
471 groups averaged across three independent experiments with three technical replicates per experiment.



472 Statistical analyses were performed in GraphPad Prism 8 using a two-way ANOVA followed by a  
473 Dunnett's test for multiple comparisons, in which each metabolite was compared to the DMSO control  
474 within each treatment group.

475

#### 476 **Quantification of *C. parvum* in metabolite-treated air-liquid interface transwells**

477 Mouse intestinal epithelial cells (mIEC) monolayers were cultured on transwells with an air-liquid  
478 interface (ALI) as previously described(27, 62). Briefly, irradiated 3T3 mouse fibroblast cells (CRL-1658  
479 ATCC) were plated on transwells (polyester membrane, 0.4  $\mu\text{m}$  pore; Corning Costar) coated with 10%  
480 Matrigel (Corning) and cultured at 37 °C for approximately 24 hr in Dulbecco's Modified Eagle's Medium  
481 (DMEM high glucose; Sigma D6429) with 10% fetal bovine serum (Sigma) and 1X penicillin/streptomycin  
482 (Sigma). Primary mouse ileal stem cells were harvested from three-day old spheroid cultures in Matrigel,  
483 dissociated with trypsin as previously described(63), and plated onto irradiated i3T3 monolayers at  
484  $5 \times 10^4$  mIECs per transwell. mIEC monolayers were cultured with 50% L-WRN conditioned medium(64)  
485 and 10  $\mu\text{M}$  Y-27632 ROCK inhibitor (Torcis Bioscience) in both the top and bottom compartments of the  
486 transwell for 7 days, after which medium was removed from the top compartment to create the air-  
487 liquid interface. Three days after removing the top medium, each transwell was infected with  $2 \times 10^5$   
488 filtered, excysted sporozoites, and DMSO control or metabolite solutions (0.5 mM except for DHA that  
489 was 0.1 mM) were added to both the top (50  $\mu\text{l}$ ) and bottom (400  $\mu\text{l}$ ) compartments of the transwell.  
490 After 3 hr of incubation, top medium was removed and each transwell was washed with PBS. Each  
491 transwell was then treated continuously with either DMSO control or metabolite solution in both the  
492 top and bottom chamber for the duration of the experiment.

493 DNA from transwells was collected and extracted using the QIAmp DNA Mini kit (QIAGEN). qPCR was  
494 performed using the QuantStudio 3 System with cycling conditions of a 10 min incubation at 95 °C, then  
495 40 cycles at 95 °C for 15s and 60 °C for 1 min, followed by a continuous melt curve analysis to identify  
496 samples with evidence of non-specific amplification. Each reaction contained 2  $\mu\text{L}$  purified transwell  
497 DNA (diluted 1:5) as a template, 10  $\mu\text{L}$  SYBR Green QuickStart Taq ReadyMix (Sigma), and 1.6  $\mu\text{L}$  of 5  $\mu\text{M}$   
498 primer solution targeting *C. parvum* GAPDH (forward: 5'-CGGATGGCCATACCTGTGAG-3' and reverse: 5'-  
499 GAAGATGCGCTGGGAACAAC-3')(27) or mouse GAPDH (forward: 5'-GCCATGAGTGGACCCTTCTT-3' and  
500 reverse: 5'-GAAAACACGGGGGCAATGAG-3')(27). Each transwell sample was run with technical  
501 duplicates, and negative (water) controls were included in each plate.

502 *C. parvum* and mIEC genomic DNA (gDNA) quantities per transwell were determined via the  
503 QuantStudio Design & Analysis New (DA2) software using standard curves for *C. parvum* and mouse

504 gDNA, respectively. Total *C. parvum* or mIEC gDNA per transwell was calculated as an average of gDNA  
505 quantities per transwell across three independent experiments with two to three technical replicates  
506 per experiment. Statistical analyses were performed in GraphPad Prism 8 using a two-way ANOVA  
507 followed by a Dunnett's test for multiple comparisons, in which each metabolite was compared to the  
508 DMSO control within each timepoint.

509

#### 510 **Data Availability**

511 16S ribosomal RNA sequencing reads are available in the ArrayExpress database  
512 (<http://www.ebi.ac.uk/arrayexpress>) under accession number E-MTAB-9100. All remaining data  
513 discussed in this report are found in the main figures or the supplementary materials.

514

515 **ACKNOWLEDGEMENTS** We are grateful to William Witola, University of Illinois, for providing the *C.*  
516 *parvum* oocysts used here, Megan Baldrige for helpful advice, and Soumya Ravindran for cell culture  
517 support. Supported in part by grants from the NIH (AI 145496 to L.D.S.). K.L.V. was supported by NIH  
518 grant DK109081. We thank the Genome Technology Access Center (GTAC) in the Department of  
519 Genetics at Washington University School of Medicine for help with 16s rRNA sequencing and analysis.  
520 The GTAC is partially supported by NCI Cancer Center Support Grant #P30 CA91842 to the Siteman  
521 Cancer Center and by ICTS/CTSA Grant# UL1TR002345 from the National Center for Research Resources  
522 (NCRR), a component of the National Institutes of Health (NIH), and NIH Roadmap for Medical Research.  
523 This publication is solely the responsibility of the authors and does not necessarily represent the official  
524 view of NCRR or NIH.

525

#### 526 **REFERENCES**

527 1. Kotloff KL, Nataro JP, Blackwelder WC, Nasrin D, Farag TH, Panchalingam S, Wu Y, Sow SO, Sur D,  
528 Breiman RF, Faruque AS, Zaidi AK, Saha D, Alonso PL, Tamboura B, Sanogo D, Onwuchekwa U,  
529 Manna B, Ramamurth T, Kanungo S, Ochieng JB, Omere R, Oundo JO, Hossain A, Das SK, Ahmed  
530 S, Qureshi S, Quadri F, Adegbola RA, Antonio M, Hossain MJ, Akinsola A, Mandomando I,  
531 Nhampossa T, Acácio S, Biswas K, O'Reilly CE, Mintz ED, Berkeley LY, Muhsen K, Sommerfelt H,  
532 Robins-Browne RM, Levine MM. 2013. Burden and aetiology of diarrhoeal disease in infants and  
533 young children in developing countries (the Global Enteric Multicenter Study, GEMS): a  
534 prospective, case-control study. *Lancet* 382:209-22.

- 535 2. Kotloff KL. 2017. The Burden and Etiology of Diarrheal Illness in Developing Countries. *Pediatr*  
536 *Clin North Am* 64:799-814.
- 537 3. Fayer R. 2004. *Cryptosporidium*: a water-borne zoonotic parasite. *Vet Parasitol* 126:37-56.
- 538 4. Peng MM, Xiao L, Freeman AR, Arrowood MJ, Escalante AA, Weltman AC, Ong CSL, Mac Kenzie  
539 WR, Lal AA, Beard CB. 1997. Genetic polymorphism among *Cryptosporidium parvum* isolates:  
540 evidence of two distinct human transmission. *Emerging Infectious Diseases* 3:567-573.
- 541 5. Feng Y, Ryan UM, Xiao L. 2018. Genetic diversity and population structure of *Cryptosporidium*.  
542 *Trends Parasitol* 34:997-1011.
- 543 6. Feng Y, Tiao N, Li N, Hlavsa M, Xiao L. 2014. Multilocus sequence typing of an emerging  
544 *Cryptosporidium hominis* subtype in the United States. *J Clin Microbiol* 52:524-30.
- 545 7. Checkley W, White AC, Jr., Jaganath D, Arrowood MJ, Chalmers RM, Chen XM, Fayer R, Griffiths  
546 JK, Guerrant RL, Hedstrom L, Huston CD, Kotloff KL, Kang G, Mead JR, Miller M, Petri WA, Jr.,  
547 Priest JW, Roos DS, Striepen B, Thompson RC, Ward HD, Van Voorhis WA, Xiao L, Zhu G, Houpt  
548 ER. 2015. A review of the global burden, novel diagnostics, therapeutics, and vaccine targets for  
549 *cryptosporidium*. *Lancet Infect Dis* 15:85-94.
- 550 8. Sherwood D, Angus KW, Snodgrass DR, Tzipori S. 1982. Experimental cryptosporidiosis in  
551 laboratory mice. *Infect Immun* 38:471-5.
- 552 9. Zambriski JA, Nydam DV, Bowman DD, Belloso ML, Burton AJ, Linden TC, Liotta JL, Ollivett TL,  
553 Tondello-Martins L, Mohammed HO. 2013. Description of fecal shedding of *Cryptosporidium*  
554 *parvum* oocysts in experimentally challenged dairy calves. *Parasitol Res* 112:1247-54.
- 555 10. Al Nabhani Z, Dulauroy S, Marques R, Cousu C, Al Bounny S, Dejardin F, Sparwasser T, Berard M,  
556 Cerf-Bensussan N, Eberl G. 2019. A Weaning Reaction to Microbiota Is Required for Resistance  
557 to Immunopathologies in the Adult. *Immunity* 50:1276-1288 e5.
- 558 11. Subramanian S, Huq S, Yatsunenkov T, Haque R, Mahfuz M, Alam MA, Benezra A, DeStefano J,  
559 Meier MF, Muegge BD, Barratt MJ, VanArendonk LG, Zhang Q, Province MA, Petri WA, Jr.,  
560 Ahmed T, Gordon JI. 2014. Persistent gut microbiota immaturity in malnourished Bangladeshi  
561 children. *Nature* 510:417-21.

- 562 12. Current WL, Reese NC. 1986. A comparison of endogenous development of three isolates of  
563 *Cryptosporidium* in suckling mice. *J Protozool* 33:98-108.
- 564 13. Umemiya R, Fukuda M, Fujisaki K, Matsui T. 2005. Electron microscopic observation of the  
565 invasion process of *Cryptosporidium parvum* in severe combined immunodeficiency mice. *J*  
566 *Parasitol* 91:1034-9.
- 567 14. Ras R, Huynh K, Desoky E, Badawy A, Widmer G. 2015. Perturbation of the intestinal microbiota  
568 of mice infected with *Cryptosporidium parvum*. *Int J Parasitol* 45:567-73.
- 569 15. Mammeri M, Chevillot A, Thomas M, Julien C, Auclair E, Pollet T, Polack B, Vallee I, Adjou KT.  
570 2019. *Cryptosporidium parvum*-Infected Neonatal Mice Show Gut Microbiota Remodelling Using  
571 High-Throughput Sequencing Analysis: Preliminary Results. *Acta Parasitol* 64:268-275.
- 572 16. Oliveira BCM, Widmer G. 2018. Probiotic Product Enhances Susceptibility of Mice to  
573 *Cryptosporidiosis*. *Appl Environ Microbiol* 84.
- 574 17. Harp JA, Wannemuehler MW, Woodmansee DB, Moon HW. 1988. Susceptibility of germfree or  
575 antibiotic-treated adult mice to *Cryptosporidium parvum*. *Infect Immun* 56:2006-10.
- 576 18. Charania R, Wade BE, McNair NN, Mead JR. 2020. Changes in the Microbiome of  
577 *Cryptosporidium*-Infected Mice Correlate to Differences in Susceptibility and Infection Levels.  
578 *Microorganisms* 8.
- 579 19. Chappell CL, Okhuysen PC, Langer-Curry R, Widmer G, Akiyoshi DE, Tanriverdi S, Tzipori S. 2006.  
580 *Cryptosporidium hominis*: experimental challenge of healthy adults. *Am J Trop Med Hyg* 75:851-  
581 7.
- 582 20. Abrahamsen MS, Templeton TJ, Enomoto S, Abrahante JE, Zhu G, Lancto CA, Deng M, Liu C,  
583 Widmer G, Tzipori S, Buck GA, Xu P, Bankier AT, Dear PH, Konfortov BA, Spriggs HF,  
584 Lakshminarayan I, Anantharaman V, Aravind L, Kapur V. 2004. Complete genome sequence of  
585 the apicomplexan, *Cryptosporidium parvum*. *Scienceexpress* 304:441-445.
- 586 21. Xu P, Widmer G, Wang Y, Ozaki LS, Alves JM, Serrano MG, Puiu D, Manque P, Akiyoshi D, Mackey  
587 AJ, Pearson WR, Dear PH, Bankier AT, Peterson DL, Abrahamsen MS, Kapur V, Tzipori S, Buck GA.  
588 2004. The genome of *Cryptosporidium hominis*. *Nature* 431:1107-12.

- 589 22. Rider SD, Jr., Zhu G. 2010. *Cryptosporidium*: genomic and biochemical features. *Exp Parasitol*  
590 124:2-9.
- 591 23. Singer JR, Blosser EG, Zindl CL, Silberger DJ, Conlan S, Laufer VA, DiToro D, Deming C, Kumar R,  
592 Morrow CD, Segre JA, Gray MJ, Randolph DA, Weaver CT. 2019. Preventing dysbiosis of the  
593 neonatal mouse intestinal microbiome protects against late-onset sepsis. *Nat Med* 25:1772-  
594 1782.
- 595 24. Knoop KA, Gustafsson JK, McDonald KG, Kulkarni DH, Coughlin PE, McCrate S, Kim D, Hsieh CS,  
596 Hogan SP, Elson CO, Tarr PI, Newberry RD. 2017. Microbial antigen encounter during a  
597 preweaning interval is critical for tolerance to gut bacteria. *Sci Immunol* 2.
- 598 25. Kim YG, Sakamoto K, Seo SU, Pickard JM, Gilliland MG, 3rd, Pudlo NA, Hoostal M, Li X, Wang TD,  
599 Feehley T, Stefka AT, Schmidt TM, Martens EC, Fukuda S, Inohara N, Nagler CR, Nunez G. 2017.  
600 Neonatal acquisition of *Clostridia* species protects against colonization by bacterial pathogens.  
601 *Science* 356:315-319.
- 602 26. Matsumoto M, Kibe R, Ooga T, Aiba Y, Kurihara S, Sawaki E, Koga Y, Benno Y. 2012. Impact of  
603 intestinal microbiota on intestinal luminal metabolome. *Sci Rep* 2:233.
- 604 27. Wilke G, Funkhouser-Jones LJ, Wang Y, Ravindran S, Wang Q, Beatty WL, Baldrige MT,  
605 VanDussen KL, Shen B, Kuhlenschmidt MS, Kuhlenschmidt TB, Witola WH, Stappenbeck TS,  
606 Sibley LD. 2019. A stem-cell-derived platform enables complete *Cryptosporidium* development  
607 in vitro and genetic tractability. *Cell Host Microbe* 26:123-134 e8.
- 608 28. Qian L, Zhao A, Zhang Y, Chen T, Zeisel SH, Jia W, Cai W. 2016. Metabolomic Approaches to  
609 Explore Chemical Diversity of Human Breast-Milk, Formula Milk and Bovine Milk. *Int J Mol Sci*  
610 17.
- 611 29. Smilowitz JT, O'Sullivan A, Barile D, German JB, Lonnerdal B, Slupsky CM. 2013. The human milk  
612 metabolome reveals diverse oligosaccharide profiles. *J Nutr* 143:1709-18.
- 613 30. Oosting A, Verkade HJ, Kegler D, van de Heijning BJ, van der Beek EM. 2015. Rapid and selective  
614 manipulation of milk fatty acid composition in mice through the maternal diet during lactation. *J*  
615 *Nutr Sci* 4:e19.

- 616 31. Neville MC, Picciano MF. 1997. Regulation of milk lipid secretion and composition. *Annu Rev*  
617 *Nutr* 17:159-83.
- 618 32. Hubbard TD, Liu Q, Murray IA, Dong F, Miller C, 3rd, Smith PB, Gowda K, Lin JM, Amin S,  
619 Patterson AD, Perdew GH. 2019. Microbiota Metabolism Promotes Synthesis of the Human Ah  
620 Receptor Agonist 2,8-Dihydroxyquinoline. *J Proteome Res* 18:1715-1724.
- 621 33. Ridlon JM, Kang DJ, Hylemon PB. 2006. Bile salt biotransformations by human intestinal  
622 bacteria. *J Lipid Res* 47:241-59.
- 623 34. Guo F, Zhang H, Payne HR, Zhu G. 2016. Differential Gene Expression and Protein Localization of  
624 *Cryptosporidium parvum* Fatty Acyl-CoA Synthetase Isoforms. *J Eukaryot Microbiol* 63:233-46.
- 625 35. Zhu G, Shi X, Cai X. 2010. The reductase domain in a Type I fatty acid synthase from the  
626 apicomplexan *Cryptosporidium parvum*: restricted substrate preference towards very long chain  
627 fatty acyl thioesters. *BMC Biochem* 11:46.
- 628 36. Fritzler JM, Millership JJ, Zhu G. 2007. *Cryptosporidium parvum* long-chain fatty acid elongase.  
629 *Eukaryot Cell* 6:2018-28.
- 630 37. Zhu G, Li Y, Cai X, Millership JJ, Marchewka MJ, Keithly JS. 2004. Expression and functional  
631 characterization of a giant Type I fatty acid synthase (CpFAS1) gene from *Cryptosporidium*  
632 *parvum*. *Mol Biochem Parasitol* 134:127-35.
- 633 38. Huang CB, Alimova Y, Myers TM, Ebersole JL. 2011. Short- and medium-chain fatty acids exhibit  
634 antimicrobial activity for oral microorganisms. *Arch Oral Biol* 56:650-4.
- 635 39. Marounek M, Skrivanova E, Rada V. 2003. Susceptibility of *Escherichia coli* to C2-C18 fatty acids.  
636 *Folia Microbiol (Praha)* 48:731-5.
- 637 40. Jadhav A, Mortale S, Halbandge S, Jangid P, Patil R, Gade W, Kharat K, Karuppayil SM. 2017. The  
638 Dietary Food Components Capric Acid and Caprylic Acid Inhibit Virulence Factors in *Candida*  
639 *albicans* Through Multitargeting. *J Med Food* 20:1083-1090.

- 640 41. Chen XM, O'Hara SP, Huang BQ, Nelson JB, Lin JJ, Zhu G, Ward HD, LaRusso NF. 2004. Apical  
641 organelle discharge by *Cryptosporidium parvum* is temperature, cytoskeleton, and intracellular  
642 calcium dependent and required for host cell invasion. *Infect Immun* 72:6806-16.
- 643 42. Elliott DA, Clark DP. 2000. *Cryptosporidium parvum* induces host cell actin accumulation at the  
644 host-parasite interface. *Infect Immun* 68:2315-22.
- 645 43. Wetzel DM, Schmidt J, Kuhlenschmidt M, Dubey JP, Sibley LD. 2005. Gliding motility leads to  
646 active cellular invasion by *Cryptosporidium parvum* sporozoites. *Infect Immun* 73:5379-5387.
- 647 44. Stubbs CD, Smith AD. 1984. The modification of mammalian membrane polyunsaturated fatty  
648 acid composition in relation to membrane fluidity and function. *Biochim Biophys Acta* 779:89-  
649 137.
- 650 45. Schmitz G, Ecker J. 2008. The opposing effects of n-3 and n-6 fatty acids. *Prog Lipid Res* 47:147-  
651 55.
- 652 46. Potiron L, Lacroix-Lamande S, Marquis M, Levern Y, Fort G, Franceschini I, Laurent F. 2019.  
653 Batf3-Dependent Intestinal Dendritic Cells Play a Critical Role in the Control of *Cryptosporidium*  
654 *parvum* Infection. *J Infect Dis* 219:925-935.
- 655 47. Lantier L, Lacroix-Lamande S, Potiron L, Metton C, Drouet F, Guesdon W, Gnahoui-David A, Le  
656 Vern Y, Deriaud E, Fenis A, Rabot S, Descamps A, Werts C, Laurent F. 2013. Intestinal CD103+  
657 dendritic cells are key players in the innate immune control of *Cryptosporidium parvum*  
658 infection in neonatal mice. *PLoS Pathog* 9:e1003801.
- 659 48. Lantier L, Drouet F, Guesdon W, Mancassola R, Metton C, Lo-Man R, Werts C, Laurent F, Lacroix-  
660 Lamande S. 2014. Poly(I:C)-induced protection of neonatal mice against intestinal  
661 *Cryptosporidium parvum* infection requires an additional TLR5 signal provided by the gut flora. *J*  
662 *Infect Dis* 209:457-67.
- 663 49. Backhed F, Roswall J, Peng Y, Feng Q, Jia H, Kovatcheva-Datchary P, Li Y, Xia Y, Xie H, Zhong H,  
664 Khan MT, Zhang J, Li J, Xiao L, Al-Aama J, Zhang D, Lee YS, Kotowska D, Colding C, Tremaroli V,  
665 Yin Y, Bergman S, Xu X, Madsen L, Kristiansen K, Dahlgren J, Wang J. 2015. Dynamics and



- 666 Stabilization of the Human Gut Microbiome during the First Year of Life. *Cell Host Microbe*  
667 17:852.
- 668 50. Bokulich NA, Chung J, Battaglia T, Henderson N, Jay M, Li H, A DL, Wu F, Perez-Perez GI, Chen Y,  
669 Schweizer W, Zheng X, Contreras M, Dominguez-Bello MG, Blaser MJ. 2016. Antibiotics, birth  
670 mode, and diet shape microbiome maturation during early life. *Sci Transl Med* 8:343ra82.
- 671 51. Yatsunenko T, Rey FE, Manary MJ, Trehan I, Dominguez-Bello MG, Contreras M, Magris M,  
672 Hidalgo G, Baldassano RN, Anokhin AP, Heath AC, Warner B, Reeder J, Kuczynski J, Caporaso JG,  
673 Lozupone CA, Lauber C, Clemente JC, Knights D, Knight R, Gordon JI. 2012. Human gut  
674 microbiome viewed across age and geography. *Nature* 486:222-7.
- 675 52. Heine J, Pohlenz JF, Moon HW, Woode GN. 1984. Enteric lesions and diarrhea in gnotobiotic  
676 calves monoinfected with *Cryptosporidium* species. *J Infect Dis* 150:768-75.
- 677 53. Riggs MW, McGuire TC, Mason PH, Perryman LE. 1989. Neutralization-sensitive epitopes are  
678 exposed on the surface of infectious *Cryptosporidium parvum* sporozoites. *J Immunol* 143:1340-  
679 5.
- 680 54. Arrowood MJ, Sterling CR. 1987. Isolation of *Cryptosporidium* oocysts and sporozoites using  
681 discontinuous sucrose and isopycnic Percoll gradients. *J Parasitol* 73:314-9.
- 682 55. Burnet JB, Ogorzaly L, Tissier A, Penny C, Cauchie HM. 2013. Novel quantitative TaqMan real-  
683 time PCR assays for detection of *Cryptosporidium* at the genus level and genotyping of major  
684 human and cattle-infecting species. *J Appl Microbiol* 114:1211-22.
- 685 56. Liu TC, Kern JT, VanDussen KL, Xiong S, Kaiko GE, Wilen CB, Rajala MW, Caruso R, Holtzman MJ,  
686 Gao F, McGovern DP, Nunez G, Head RD, Stappenbeck TS. 2018. Interaction between smoking  
687 and ATG16L1T300A triggers Paneth cell defects in Crohn's disease. *J Clin Invest* 128:5110-5122.
- 688 57. Schriefer AE, Cliften PF, Hibberd MC, Sawyer C, Brown-Kennerly V, Burcea L, Klotz E, Crosby SD,  
689 Gordon JI, Head RD. 2018. A multi-amplicon 16S rRNA sequencing and analysis method for  
690 improved taxonomic profiling of bacterial communities. *J Microbiol Methods* 154:6-13.
- 691 58. Caporaso JG, Kuczynski J, Stombaugh J, Bittinger K, Bushman FD, Costello EK, Fierer N, Pena AG,  
692 Goodrich JK, Gordon JI, Huttley GA, Kelley ST, Knights D, Koenig JE, Ley RE, Lozupone CA,

- 693 McDonald D, Muegge BD, Pirrung M, Reeder J, Sevinsky JR, Turnbaugh PJ, Walters WA,  
694 Widmann J, Yatsunenکو T, Zaneveld J, Knight R. 2010. QIIME allows analysis of high-throughput  
695 community sequencing data. *Nat Methods* 7:335-6.
- 696 59. Segata N, Izard J, Waldron L, Gevers D, Miropolsky L, Garrett WS, Huttenhower C. 2011.  
697 Metagenomic biomarker discovery and explanation. *Genome Biol* 12:R60.
- 698 60. Xia J, Sinelnikov IV, Han B, Wishart DS. 2015. MetaboAnalyst 3.0--making metabolomics more  
699 meaningful. *Nucleic Acids Res* 43:W251-7.
- 700 61. Zhang X, Kim CY, Worthen T, Witola WH. 2018. Morpholino-mediated in vivo silencing of  
701 *Cryptosporidium parvum* lactate dehydrogenase decreases oocyst shedding and infectivity. *Int J*  
702 *Parasitol* 48:649-656.
- 703 62. Wilke G, Wang Y, Ravindran S, Stappenbeck T, Witola WH, Sibley LD. 2020. In vitro culture of  
704 *Cryptosporidium parvum* using stem cell-derived intestinal epithelial monolayers, p 351-372. *In*  
705 Mead J, Arrowood M (ed), *Cryptosporidium Methods in Molecular Biology*, vol 2052. Humana,  
706 New York, NY.
- 707 63. Moon C, VanDussen KL, Miyoshi H, Stappenbeck TS. 2014. Development of a primary mouse  
708 intestinal epithelial cell monolayer culture system to evaluate factors that modulate IgA  
709 transcytosis. *Mucosal Immunol* 7:818-28.
- 710 64. Miyoshi H, Ajima R, Luo C, Yamaguchi TP, Stappenbeck TS. 2012. Wnt5a potentiates TGF-beta  
711 signaling to promote colonic crypt regeneration after tissue injury. *Science* 338:108-13.
- 712  
713  
714

715 **FIGURE LEGENDS**

716 **Fig 1. Differences between *C. parvum* infectivity and cecal microbiota during murine postnatal**

717 **development.** (A) Diagram of the experimental design. Separate cohorts of mice were challenged with 5  
718  $\times 10^4$  *C. parvum* (Cp) oocysts at each week of life (N = 5-10 mice per week). Five days post infection (p.i.),  
719 intestines were removed, and the number of *C. parvum* organisms per gram of intestine was quantified  
720 by qPCR. In a separate experiment, cecal contents and small intestinal luminal contents were collected  
721 from uninfected mice at 1, 2, 3, and 6 weeks of age (N = 12 mice per week) for 16S ribosomal RNA  
722 sequencing and metabolomics, respectively. (B) Line graph depicting the average number of *C. parvum*  
723 organisms per gram intestine of mice infected at the indicated weeks of age (mean  $\pm$  S.D., N = 10 mice  
724 each for weeks 1 and 2, N = 5 mice each for weeks 3-6). (C) Taxonomic differences in the cecal  
725 microbiota of mice at 1, 2, 3, or 6-weeks of age displayed as a stacked bar graph of the relative  
726 abundances of the bacterial genera detected by 16S ribosomal RNA sequencing.

727

728 **Fig 2. Differences in small intestinal metabolites during murine postnatal development.** (A) PCoA plot

729 of weighted Unifrac distances between cecal microbiota samples and (B) PCA plot of small intestinal  
730 metabolite differences from the same mice sampled at 1, 2, 3, or 6-weeks of age. (C) Hierarchical  
731 clustering of the top 30 metabolites that most significantly differed between groups as analyzed by one-  
732 way ANOVA, represented as a heat map with red indicating relative enrichment and blue indicating  
733 relative de-enrichment for the listed metabolites. (E) Bar graph showing the top 30 metabolites with  
734 relative abundances most significantly correlated with age by Pearson's correlation. Red = negative  
735 correlation of metabolite abundance with age. Green = positive correlation of metabolite abundance  
736 with age.

737

738 **Fig 3. Effects of neonatal metabolites on *Cryptosporidium* growth.** Average ratio of *C. parvum* parasites

739 in treated samples relative to DMSO controls 24 hpi with metabolites in decreasing order of (A) fold  
740 decrease in abundance from mice aged 1 week to mice aged 3 weeks and (B) decreasing order of  
741 abundance in mice aged 1 week. Metabolites in green were found to significantly enhance growth, and  
742 metabolites in red were found to significantly inhibit growth. The three metabolites with the highest  
743 fold enhancement of growth are labeled: docosahexaenoic acid (DHA), linoleic acid (LA), and linolenic  
744 acid (LnA). \*  $P \leq 0.05$ , \*\*  $P \leq 0.01$ , \*\*\*  $P \leq 0.001$ , \*\*\*\*  $P \leq 0.0001$ .

745

746 **Fig 4. Enhancement of parasite growth and invasion by metabolites and related molecules. (A)**  
747 Average ratio of *C. parvum* parasites 24 hpi in treated samples relative to DMSO controls for the  
748 metabolites docosahexaenoic acid (DHA), linoleic acid (LA), and linolenic acid (LnA) and the related  
749 compounds eicosapentaenoic acid (EPA) and arachidonic acid (AA). All tested compounds displayed  
750 significant enhancement of *C. parvum* growth compared to the DMSO control. (B) Samples were  
751 infected with filtered *C. parvum* sporozoites and washed after a 2.5 hr incubation period. Average ratio  
752 of attached *C. parvum* parasites relative to DMSO controls compared between samples that were pre-  
753 treated with metabolites for 2 hr and samples with metabolites added immediately after infection. (C)  
754 Average ratio of *C. parvum* parasites relative to DMSO control in samples infected with filtered  
755 sporozoites and treated with metabolites during invasion (0-2.5 hpi), after invasion (2.5-24 hpi), and for  
756 the duration of the experiment (0-24 hpi). (D) Effects of metabolite treatment on *C. parvum* growth in  
757 air-liquid interface (ALI) culture determined by average total *C. parvum* genomic DNA (gDNA) equivalent  
758 per transwell on days 0, 1, 3 and 5 post infection (mean  $\pm$  S.D., N = 9 transwells per metabolite or N= 8  
759 for DMSO). DHA and AA were tested at a final concentration of 0.1 mM and all other metabolites were  
760 tested at a final concentration of 0.5 mM. \*\*\*\*  $P \leq 0.0001$   
761

762 **Supplemental Material**

763 Fig S1. Experimental timeline for testing murine susceptibility to *C. parvum* and for collecting samples

764 for meta

765 Fig S2. Cecal microbiota taxonomic differences during murine postnatal development.

766 Fig S3. Average host cell viability of Air-liquid Interface (ALI) culture

767

768

# Figure 1

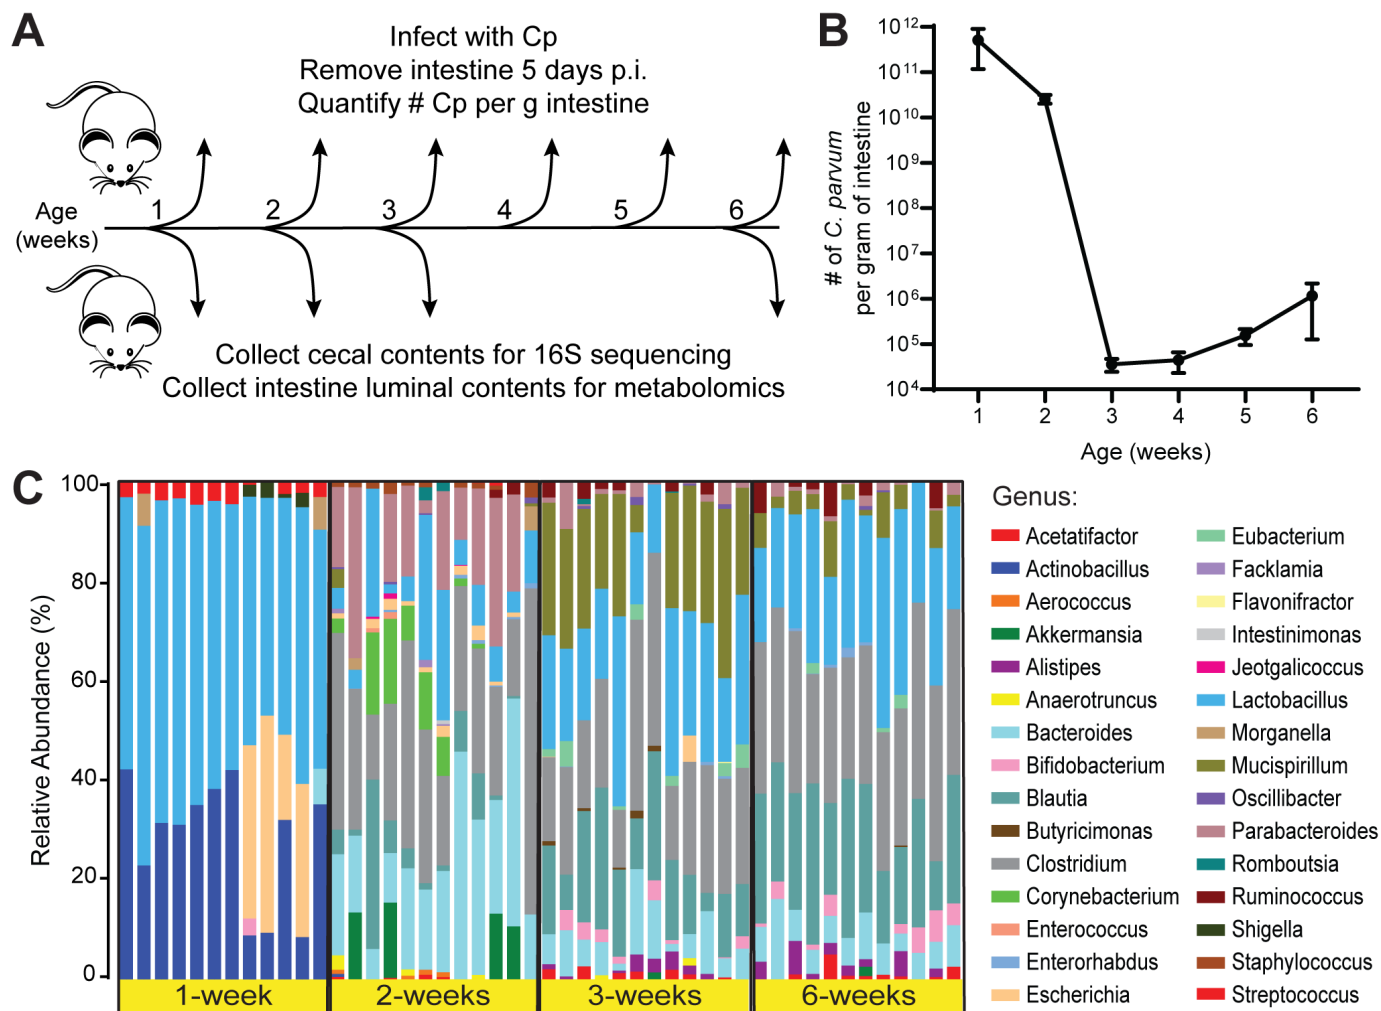

## Figure 2

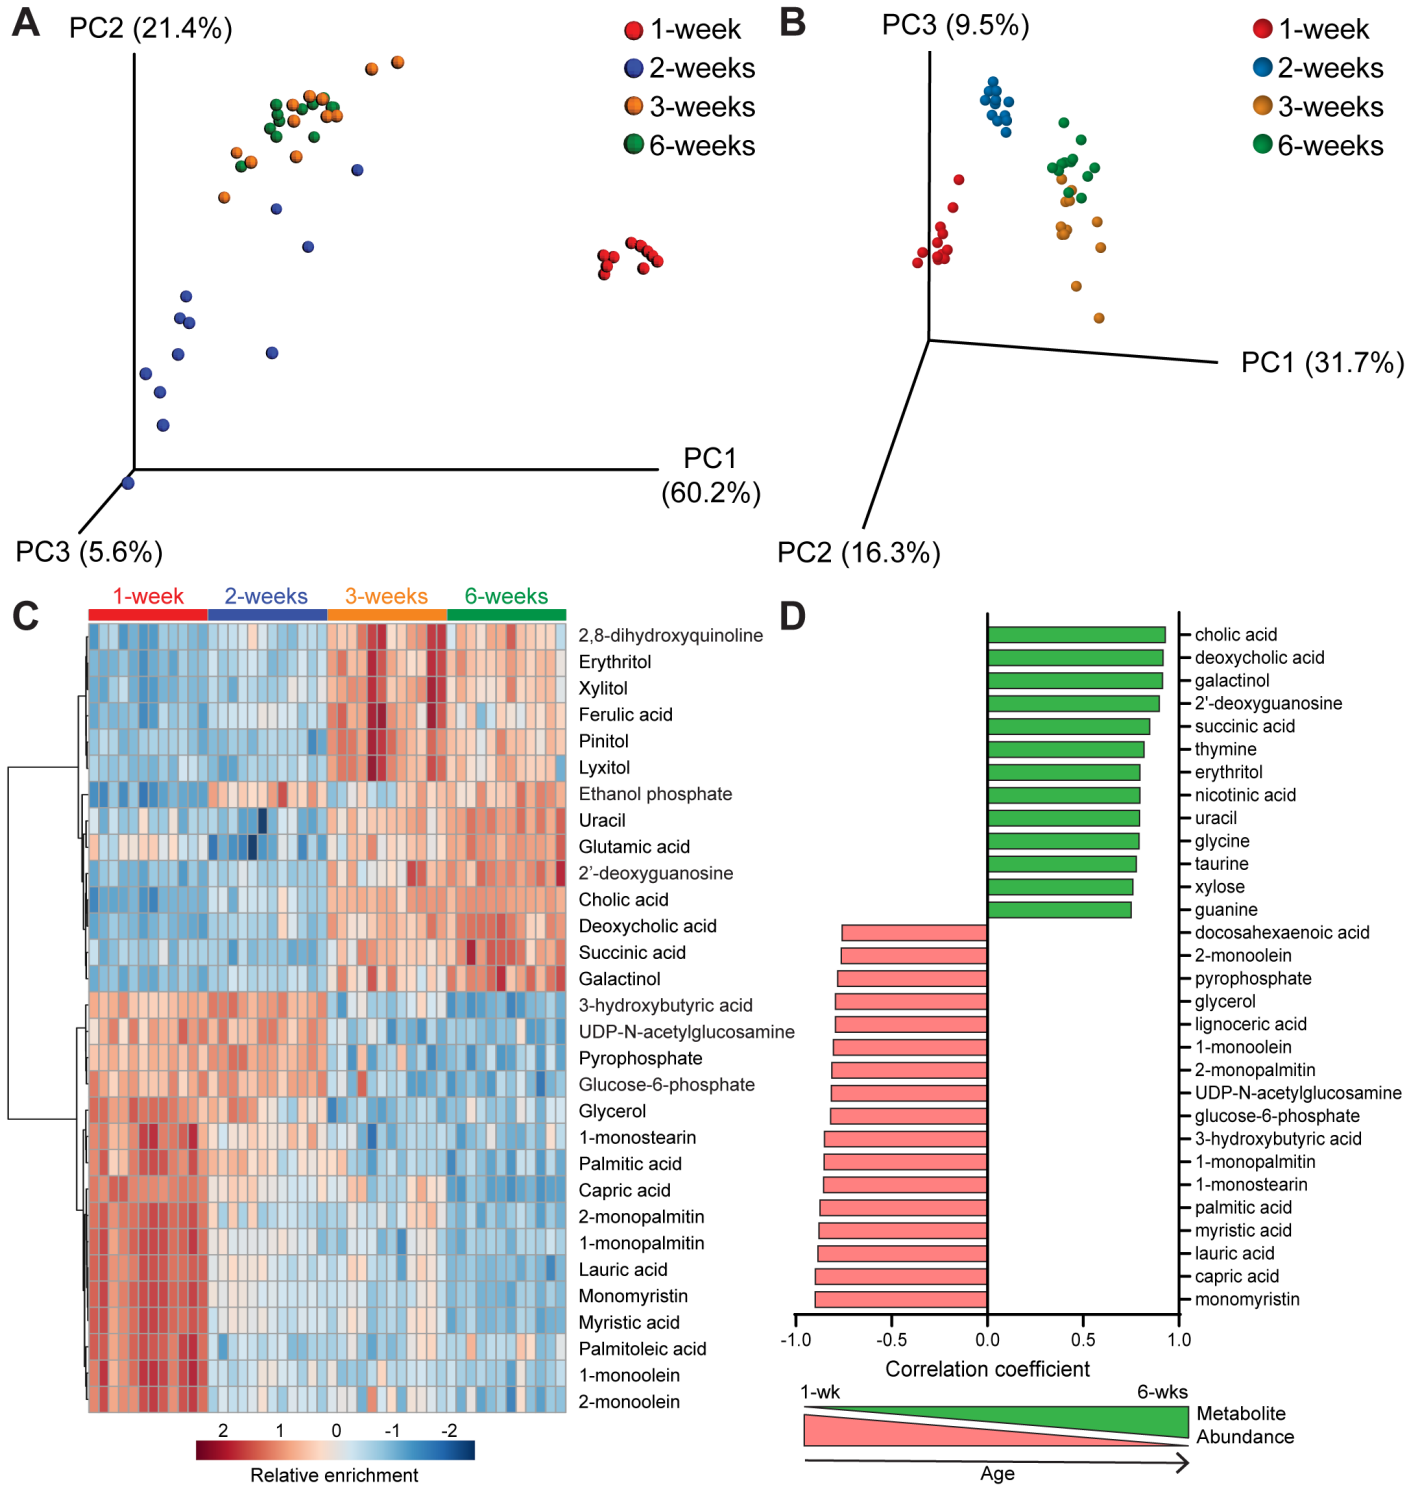



# Figure 3

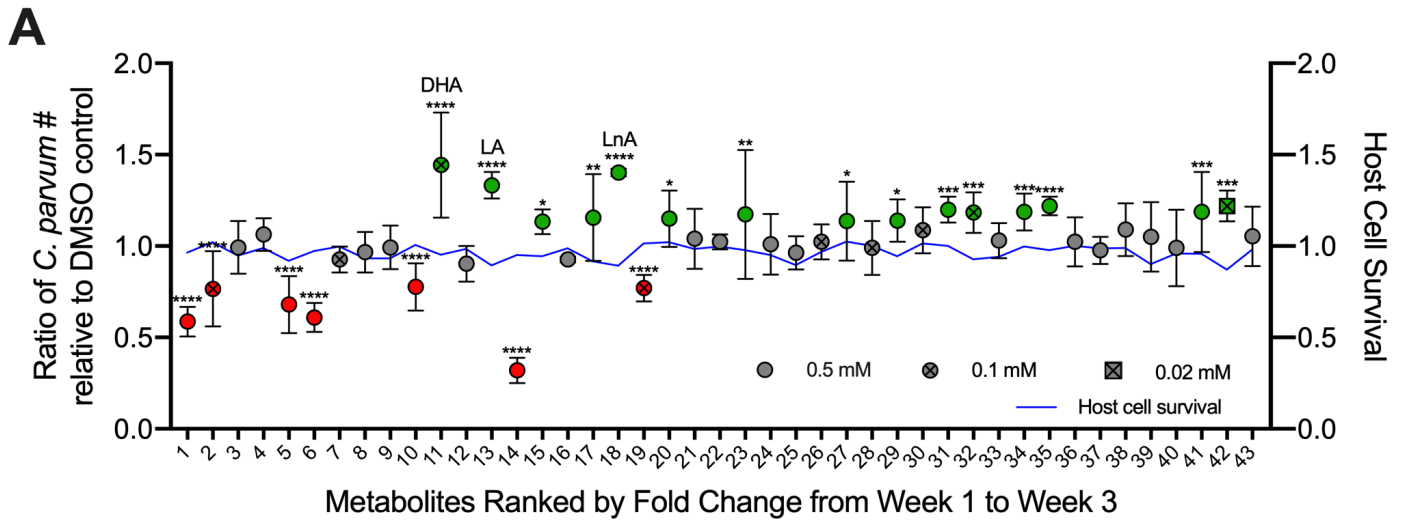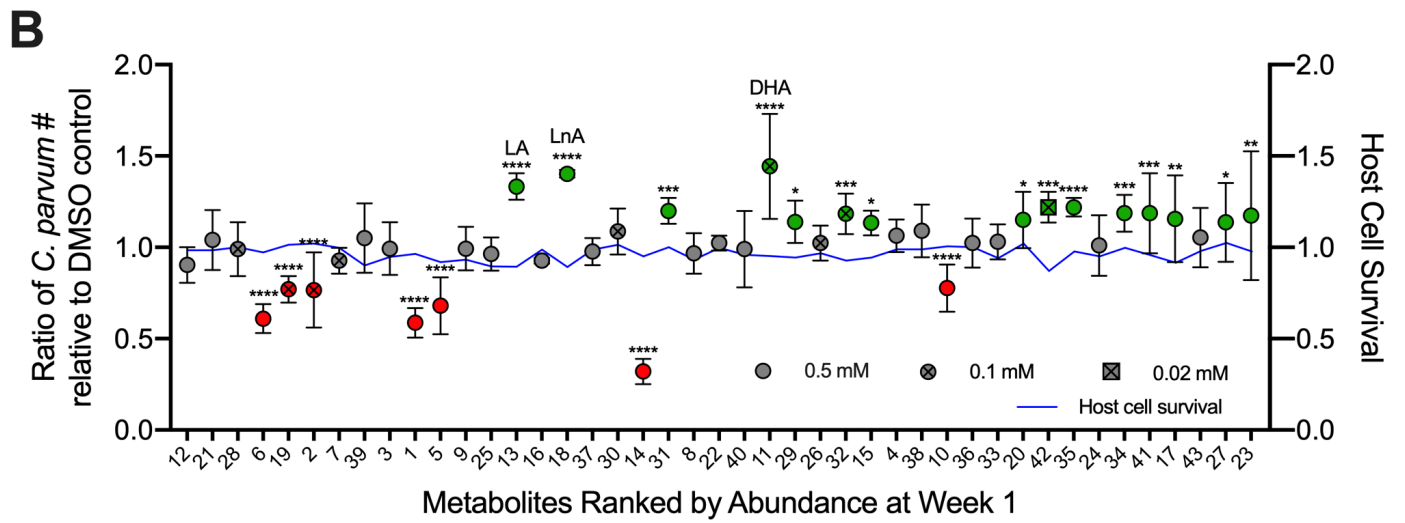

## Figure 4

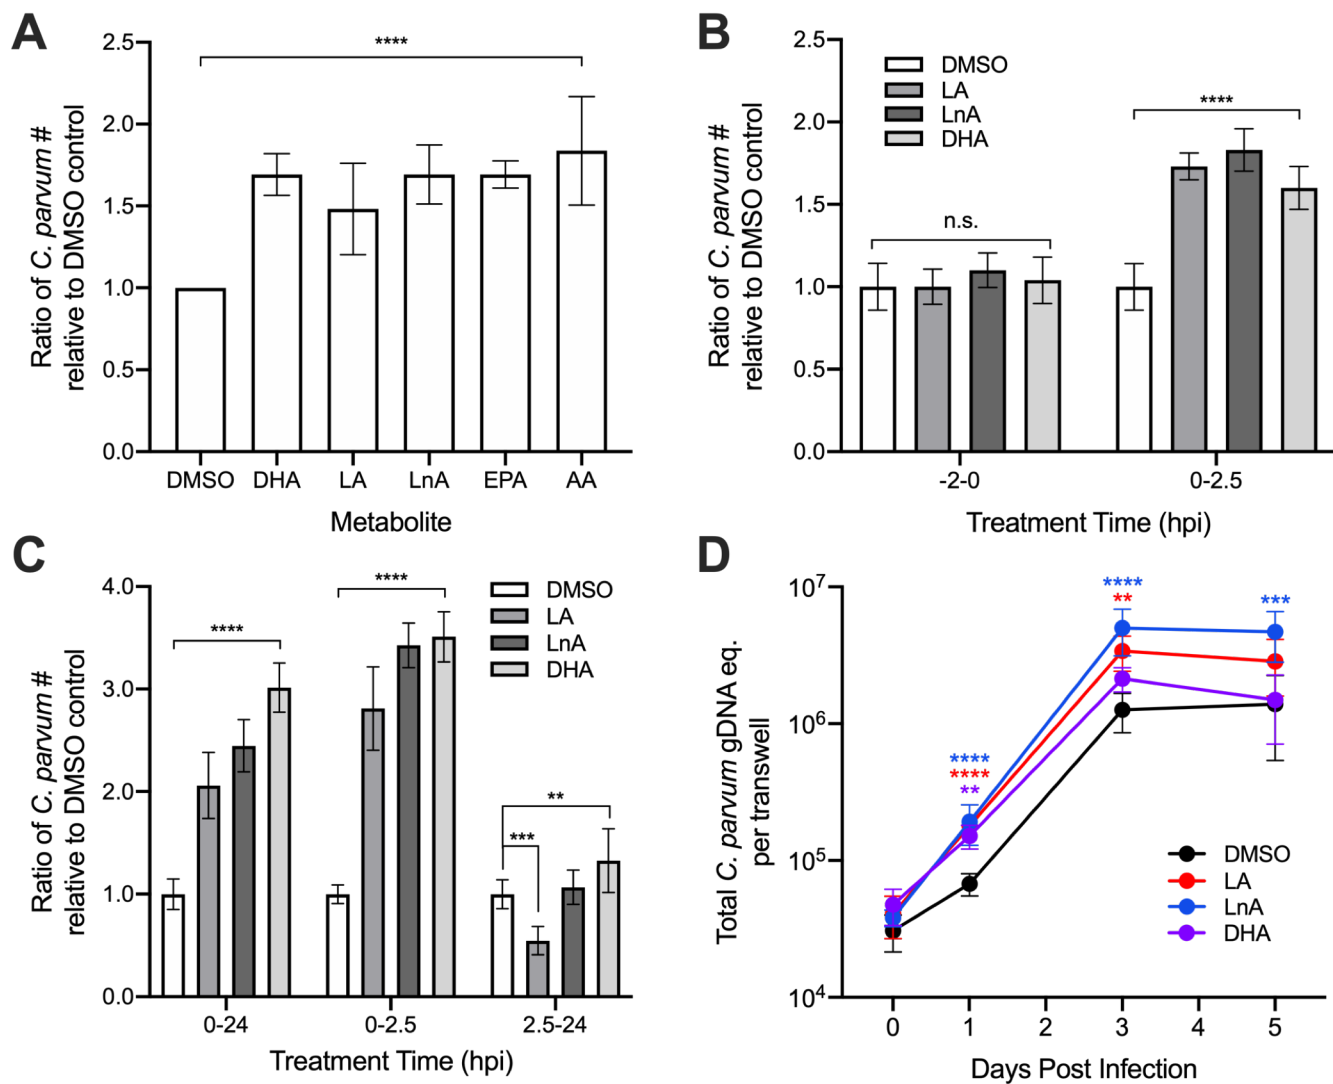

Source: https://www.biorxiv.org/content/10.1101/2020.09.11.294462v1.full.pdf
